# Supplementary material for: Performance evaluation of Zr(CUR)/NiCo2S4/CuCo2S4 and Zr(CUR)/CuCo2S4/Ag2S composites for photocatalytic degradation of the methyl parathion pesticide using a spiral-shaped photocatalytic reactor
Source: Royal Society of Chemistry journal article supplement (doi:10.1039/d2ra06277a), 2022-01-01
Supplement: d2ra06277a1.pdf [file d2ra06277a1.pdf]

## Performance evaluation of Zr(CUR)/NiCo<sub>2</sub>S<sub>4</sub>/CuCo<sub>2</sub>S<sub>4</sub> and Zr(CUR) /CuCo<sub>2</sub>S<sub>4</sub>/Ag<sub>2</sub>S composites for photocatalytic degradation of the methyl parathion pesticide using a spiral-shaped photocatalytic reactor

Hamideh Zolfaghari<sup>a</sup>, Fakhri Yousefi<sup>a,\*</sup>, Mehrorang Ghaedi<sup>a,\*\*</sup>, Soleiman Mosleh<sup>b</sup>

<sup>a</sup> Chemistry Department, Yasouj University, Yasouj 75918-74831, Iran

<sup>b</sup> Polymer Engineering Department, Faculty of Gas and Petroleum, Yasouj University, Gachsaran, 75813-56001, Iran

\* Corresponding Authors: [fyousefi@yu.ac.ir](mailto:fyousefi@yu.ac.ir), [m\\_ghaedi@yu.ac.ir](mailto:m_ghaedi@yu.ac.ir)

### Supplementary information

#### The details of DOM for solving the radiative transport equation (RTE) in the spiral-shaped photoreactor

The radiative transport equation (RTE) was solved using the discrete ordinate method (DOM) for the description of the light irradiation inside the spiral-shaped photoreactor. The COMSOL Multiphysics® software was used as a powerful CFD tool for numerical simulation. This software has a special Module for solving the radiative transfer equation through discretization. The applied technique contains a numerical integration which considered a set of discrete directions for the radiation and associated quadrature weights. Since the angular space is continuous, the radiative intensity was determined for any direction ( $\Omega$ ), then the specified equations were solved numerically by the discretization of the angular space, as follows [1]:

$$\int_{4\pi} I(\Omega) d\Omega \approx \sum_{j=1}^n \omega_j I_j \quad (\text{S-1})$$

where in this equation  $\omega_j$  denotes the  $i$ -th quadrature weight.

For any discrete ordinate, Eq. (S-2) was applied as follows [1-3]:

$$S_i \cdot \nabla I_i = \kappa I_b(T) - \beta I_i + \frac{\sigma_s}{4\pi} \sum_{j=1}^n \omega_j I_j \Phi(S_j \cdot S_i) \quad (\text{S-2})$$

where  $S_i$  refers to the  $i$ -th discrete ordinate, and  $I_i$  denotes the  $i$ -th component of the radiative intensity.

The boundary conditions for solving Eq. (S-2) are presented as follows:

$$I_{i,bnd} = \varepsilon I_b(T) + \frac{1 - \varepsilon}{\pi} q_{out} \quad (\text{S-3})$$

The  $q_{out}$  was calculated using Eq. (S-4):

$$q_{r.out} = \sum_{n \cdot \Omega_j > 0} \omega_j I_j n \Omega_j \quad (S-4)$$

The additional computational details are presented at Table S-1, as follows:

**Table S1.** The additional computational details.

| Parameter                                           | Value                              | Considerations                                  |
|-----------------------------------------------------|------------------------------------|-------------------------------------------------|
| Photocatalyst absorption coefficient ( $\kappa_a$ ) | $5.028 \times 10^5 \text{ m}^{-1}$ | Estimated at wavelength ( $\lambda$ ) of 395 nm |
| Light intensity                                     | $10 \text{ W} \cdot \text{m}^{-2}$ | Imposed on the reactor surface                  |
| Unstructured grids                                  | 287,000 nodes                      | 1,538,000 tetrahedral cells                     |
| Purely absorbent medium                             | $\kappa_a=1$<br>$\sigma_s=0$       | Used as the boundary condition.                 |
| Non-reflective wall                                 | $\varepsilon = 0$                  | Used as the boundary condition.                 |

[1] <https://www.comsol.com/blogs/author/nancy-bannach/> [10/5/2022]

[2] <https://www.comsol.com/blogs/heat-transfer-in-participating-media-and-the-discrete-ordinates-method/> [10/5/2022]

[3] <https://www.comsol.com/blogs/4-methods-to-account-for-radiation-in-participating-media/> [10/5/2022]

**Table S2.** Specification of used LED

| Items               | Min. | Type | Max.  | Unit |
|---------------------|------|------|-------|------|
| Power               | -    | -    | 14.40 | W/m  |
| Luminous Intensity  | 1000 | -    | 3500  | mcd  |
| Dominant Wavelength | 395  | -    | 405   | nm   |
| 50% Power Angle     | -    | 120  | -     | Deg. |

**Table S3.** The empirical results of the MP degradation process.

| Run | X <sub>1</sub> | X <sub>2</sub> | X <sub>3</sub> | X <sub>4</sub> | Y     |
|-----|----------------|----------------|----------------|----------------|-------|
| 1   | 0.4            | 4              | 15             | 20             | 20.39 |
| 2   | 0.6            | 6              | 20             | 30             | 77.85 |
| 3   | 0.8            | 4              | 15             | 40             | 99.86 |
| 4   | 0.6            | 6              | 20             | 30             | 76.99 |
| 5   | 0.6            | 6              | 20             | 30             | 77.18 |
| 6   | 0.4            | 8              | 15             | 40             | 89.53 |
| 7   | 0.8            | 8              | 15             | 20             | 61.02 |
| 8   | 0.6            | 6              | 20             | 30             | 77.27 |
| 9   | 0.4            | 8              | 25             | 40             | 72.01 |
| 10  | 0.8            | 4              | 25             | 40             | 70.12 |
| 11  | 0.4            | 4              | 25             | 20             | 3.74  |
| 12  | 0.8            | 8              | 25             | 20             | 41.50 |
| 13  | 0.6            | 6              | 20             | 30             | 84.50 |
| 14  | 0.6            | 6              | 30             | 30             | 57.47 |
| 15  | 0.6            | 2              | 20             | 30             | 58.34 |
| 16  | 0.6            | 6              | 20             | 30             | 84.68 |
| 17  | 0.6            | 6              | 20             | 10             | 19.21 |
| 18  | 1              | 6              | 20             | 30             | 58.95 |
| 19  | 0.6            | 10             | 20             | 30             | 98.77 |
| 20  | 0.2            | 6              | 20             | 30             | 28.84 |
| 21  | 0.6            | 6              | 10             | 30             | 99.15 |
| 22  | 0.6            | 6              | 20             | 50             | 98.04 |

**Table S4.** The statistical evidence along with analysis of variance.

| Source of variation           | Sum of Squares | Degree of Freedom | Mean Square | F-Value  | P-value  |
|-------------------------------|----------------|-------------------|-------------|----------|----------|
| Model                         | 16360.82       | 14                | 1168.63     | 13401.06 | < 0.0001 |
| X <sub>1</sub>                | 453.19         | 1                 | 453.19      | 5196.91  | < 0.0001 |
| X <sub>2</sub>                | 817.29         | 1                 | 817.29      | 9372.15  | < 0.0001 |
| X <sub>3</sub>                | 1738.68        | 1                 | 1738.68     | 19938.02 | < 0.0001 |
| X <sub>4</sub>                | 3107.08        | 1                 | 3107.08     | 35629.93 | < 0.0001 |
| X <sub>1</sub> X <sub>2</sub> | 139.30         | 1                 | 139.30      | 1597.39  | < 0.0001 |
| X <sub>1</sub> X <sub>3</sub> | 28.46          | 1                 | 28.46       | 326.40   | < 0.0001 |
| X <sub>1</sub> X <sub>4</sub> | 7.44           | 1                 | 7.44        | 85.31    | < 0.0001 |
| X <sub>2</sub> X <sub>3</sub> | 10.93          | 1                 | 10.93       | 125.31   | < 0.0001 |
| X <sub>2</sub> X <sub>4</sub> | 44.28          | 1                 | 44.28       | 507.78   | < 0.0001 |
| X <sub>3</sub> X <sub>4</sub> | 15.37          | 1                 | 15.37       | 176.29   | < 0.0001 |
| X <sub>1</sub> <sup>2</sup>   | 2743.19        | 1                 | 2743.19     | 31457.06 | < 0.0001 |
| X <sub>2</sub> <sup>2</sup>   | 63.64          | 1                 | 63.64       | 729.80   | < 0.0001 |
| X <sub>3</sub> <sup>2</sup>   | 68.75          | 1                 | 68.75       | 788.35   | < 0.0001 |
| X <sub>4</sub> <sup>2</sup>   | 1122.81        | 1                 | 1122.81     | 12875.65 | < 0.0001 |
| Residual                      | 0.52           | 6                 | 0.09        |          |          |
| Lack of Fit                   | 0.095          | 2                 | 0.05        | 0.44     | 0.6694   |
| Pure Error                    | 0.43           | 4                 | 0.11        |          |          |
| Cor Total                     | 16489.14       | 21                |             |          |          |

**Table S5.** The maximum adsorption capacity ( $q_{\max}$ ) of prepared samples.

| Sample                                                                     | $q_{\max}$ (mg. g <sup>-1</sup> ) |
|----------------------------------------------------------------------------|-----------------------------------|
| Zr(CUR)/NiCo <sub>2</sub> S <sub>4</sub> /CuCo <sub>2</sub> S <sub>4</sub> | 1124.42                           |
| Zr(CUR) /CuCo <sub>2</sub> S <sub>4</sub> /Ag <sub>2</sub> S               | 1008.05                           |
| NiCo <sub>2</sub> S <sub>4</sub>                                           | 642.25                            |
| CuCo <sub>2</sub> S <sub>4</sub>                                           | 595.60                            |
| Ag <sub>2</sub> S                                                          | 287.15                            |

**Table S6. Confirmation Tests.**

| Run | X <sub>1</sub> | X <sub>2</sub> | X <sub>3</sub> | X <sub>4</sub> | MP Degradation (%) |           |           |
|-----|----------------|----------------|----------------|----------------|--------------------|-----------|-----------|
|     |                |                |                |                | Actual             | Predicted | Error (%) |
| 1   | 0.5            | 4              | 20             | 25             | 27.02              | 29.17     | 7.37      |
| 2   | 0.4            | 6              | 15             | 40             | 45.28              | 43.83     | 3.31      |
| 3   | 0.8            | 4              | 25             | 30             | 60.45              | 61.10     | 1.06      |
| 4   | 0.2            | 6              | 10             | 10             | 16.29              | 15.22     | 7.03      |
| 5   | 0.6            | 10             | 30             | 40             | 95.33              | 96.37     | 1.08      |

**Table S7.** The quantitative information for MP degradation along the reactor.

| Turn            | <b>1</b> |       | <b>2</b> |       | <b>3</b> |       |
|-----------------|----------|-------|----------|-------|----------|-------|
| Θ               | 90       | 270   | 450      | 630   | 810      | 990   |
| MP% Degradation | 3.52     | 9.25  | 11.25    | 24.68 | 37.99    | 46.02 |
| Turn            | <b>4</b> |       | <b>5</b> |       | <b>6</b> |       |
| Θ               | 1170     | 1350  | 1530     | 1710  | 1890     | 2070  |
| MP% Degradation | 51.43    | 60.95 | 71.01    | 77.2  | 84.95    | 98.78 |
